# Supplementary material
Source: PubMed Central journal article supplement (PMC5985975)

**Supplementary Figure S1** Summary of interferon score data in parents heterozygous for a recessive *ADAR1* mutation, either p.Pro193Ala or non-p.Pro193Ala, and in controls.

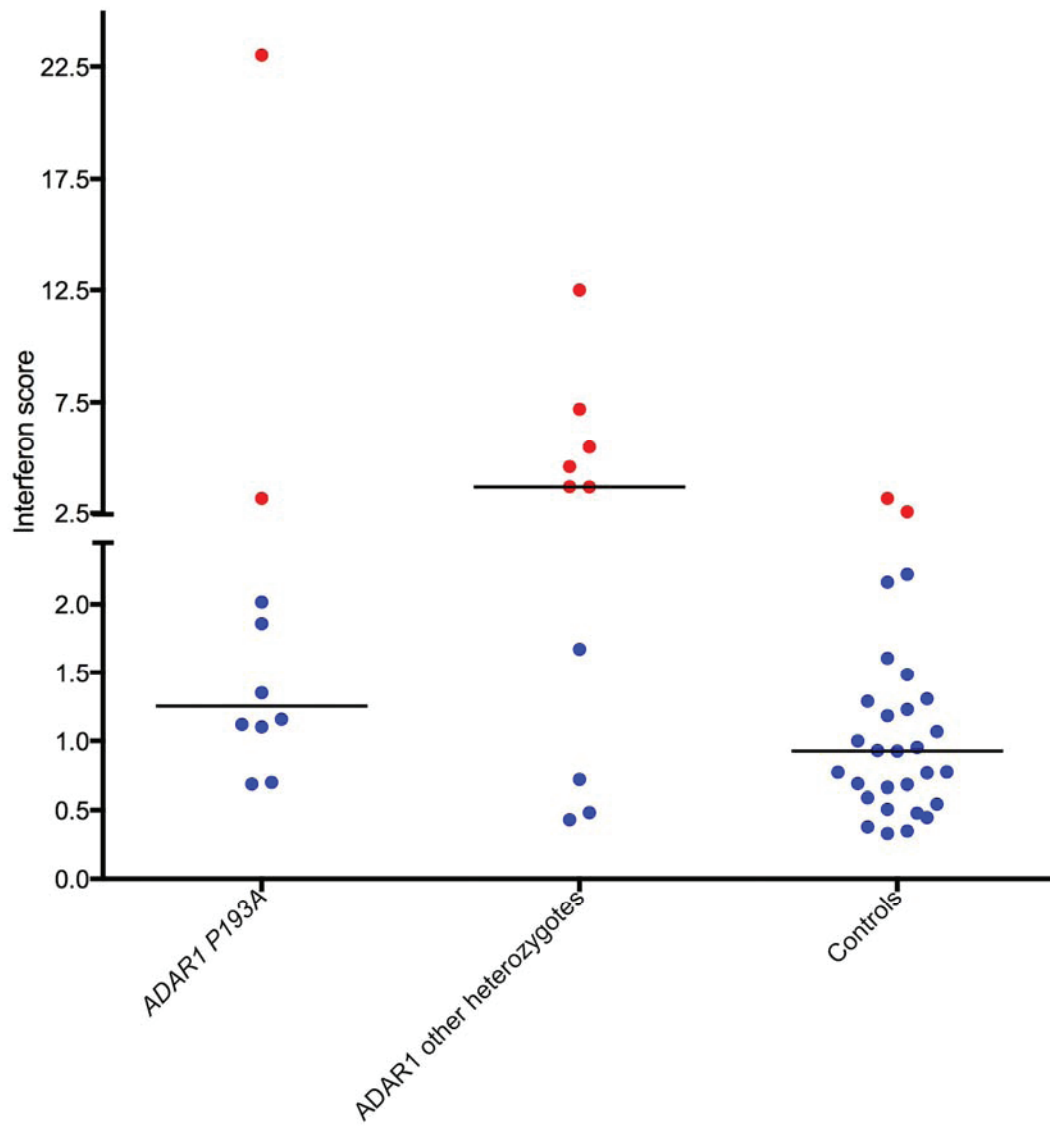

Supplement: NIHMS963821-supplement-Supplementary_Fig_1.pdf [file NIHMS963821-supplement-Supplementary_Fig_1.pdf]
