# Supplementary material
Source: PubMed Central journal article supplement (PMC5985975)
Supplement: NIHMS963821-supplement-Supplementary_Table_1.pdf [file NIHMS963821-supplement-Supplementary_Table_1.pdf]

**Supplementary Table S1** *ADAR1* primer sequences

| <b>Exon</b>       | <b>Primer name</b> | <b>Sequence</b>          |
|-------------------|--------------------|--------------------------|
| Exon 1 001 (p150) | adar001E1F         | AGCGGAGGGGTTTCGACTT      |
|                   | adar001E1R         | ACACTCACAAGACGCACACG     |
| Exon 1 201 (p110) | adar201E1F         | ACAGCGGCATTAACACAACG     |
|                   | adar201E1R         | CAACGCCAGAGACTGGAGAG     |
| Exon 2            | adar1E2aF          | TCACCCTAGCCAAGTCATAAGC   |
|                   | adar1E2aR          | GGACACCCCTGATGTCCACT     |
|                   | adar1E2bF          | CACCTTCCCTCCCAGGACT      |
|                   | adar1E2bR          | GTCTTCCGGTTCCAAACTCG     |
|                   | adar1E2cF          | CGCGGTCTCCACTCAGGCTTGG   |
|                   | adar1E2cR          | CCCTGCCTTTCCATGTCAAT     |
|                   | adar1E2dF          | CTCCTCTGCCCTGAATTTGG     |
|                   | adar1E2dR          | GAAGGAGGGCATCTCCATGA     |
|                   | adar1E2eF          | GCCACAGATGACATCCCAGA     |
|                   | adar1E2eR          | AATCAGCCAAGACTGCGTCA     |
| Exon 3            | adar1E3F           | AAAGCCCCTTAGCGTAGCAG     |
|                   | adar1E3R           | TTGCCTCAAGGGAGTCAGTT     |
| Exon 4            | adar1E4F           | CCTTGACAGGTGGTGGGAAT     |
|                   | adar1E4R           | CCTGAGGAGGCAAGGAAGAA     |
| Exon 5            | adar1E5F           | TGACTGCACAGAGGTGATGTG    |
|                   | adar1E5R           | TGAGGGAGTCACTGGCAATC     |
| Exon 6            | adar1E6F           | TGAGTGGTTTAAGATTGCCAGTG  |
|                   | adar1E6R           | ACAGACCATCCCCAACTGGT     |
| Exon 7            | adar1E7F           | ACTGGCCACATCTTCAGCAA     |
|                   | adar1E7R           | ACTCGCATGACAGCAAGAGC     |
| Exon 8            | adar1E8F           | GATGACTCACACGACAAGTAGAGC |
|                   | adar1E8R           | GACTCCAGGGGAGGATGAGA     |
| Exon 9            | adar1E9F           | TGAGGCTGTTTCTGCCTTGA     |
|                   | adar1E9R           | GATTCAGAGGCCGTGTCAGA     |
| Exon 10           | adar1E10F          | TGTGAAACGTCTGCAACATTGA   |
|                   | adar1E10R          | ACAGGCCAGGAGAGCATTG      |
| Exon 11           | adar1E11F          | GCTGTCCACCTCCAGTCTCC     |
|                   | adar1E11R          | TCTGTGCCAGTGACTAATGG     |
| Exon 12           | adar1E12F          | GGCCCAAGCTTAAGGAGGAT     |
|                   | adar1E12R          | CCTGGCAATAAAGCATGCAG     |
| Exon 13           | adar1E13F          | CTCCAAAATCCCCACATGCT     |
|                   | adar1E13R          | GCTACCACTGTGGGCAATGT     |
| Exon 14           | adar1E14F          | TCATGACCCCACACTTCCTC     |
|                   | adar1E14R          | GCCCTGAGACTGCAGAGGTA     |
| Exon 15           | adar1E15aF         | GACTTGCAAGGGTGCATCA      |
|                   | adar1E15aR         | ATCCCCTGACCATGTGATGA     |
